# Supplementary material
Source: MDPI journal article supplement (https://www.mdpi.com/2076-3263/9/9/379)
Supplement: s1 [file s1]

## Sheet: Table S1
Major oxides (weight %) in the analyzed ash shards from the sediment fraction of >100μm in samples of the core AMK-340.
Numbers are the averaged values of 2-4 measurements.
If Total sum is 100%, values are normalized.
Pisolites are marked by bold font.
Measurements on polished thin sections are marked by green color.
Samples, cm	weight %
	Na2O	MgO	Al2O3	SiO2	CaO	TiO2	FeO	K2O	Total sum
323-325	4,89	0,96	14,92	50,76	11,73	4,74	11,25	0,76	100
	4,07	0,97	12,81	42,08	12,69	8,11	17,55	0,71	100
	3,88	1,42	14,04	47,93	11,29	4,13	8,98	0,91	100
	0.82	4.32	13.39	65.49	1.92	0.94	11.75	1.38	100
	1.73	3.56	13.06	53.48	8.83	3.89	15.46	0	100
	3.22	4.3	14.1	55.77	8.59	3.57	10.26	0.19	100
	3.04	6.36	16.05	50.58	9.97	2.1	10.39	0.55	99.04
	2.7	3.54	12.4	49.1	9.73	5.43	17.1	0	100
	3.37	6.16	14.25	57.15	7.84	3.01	8.2	0	100
	1.96	7.49	13.83	51.67	11.95	1.49	11.51	0.08	100
	2.91	6.8	14.79	49.45	11.55	2.38	12.11	0	100
	0	5.74	10.19	50.22	15.78	0.68	17.07	0.3	100
	2.12	1.92	22.72	58.18	10.13	0.53	4.39	0	100
	3.2	0	11.9	76.37	0.45	0	4.17	3.92	100
328-330	2.6	3.73	21.82	52.39	12.84	0.75	5.87	0	100
	0	16,1	2,58	54,37	20,06	0,71	6,19	0	100
	1.19	3.29	16.52	61.28	3.6	4.06	6.19	3.46	99.6
	0,77	4,9	13,57	64,94	5,08	1,1	6,63	3	100
	1,05	5,27	15,74	52,03	8,63	4,09	10,34	2,84	100
	1,21	5,65	13,57	59,17	6,86	1,1	9,71	2,74	100
	3,04	5,7	12,5	49,22	10,46	4,16	14,14	0,78	100
	2.01	5.58	12.81	57.49	6.58	1.9	12.18	1.43	99.98
	1.77	9.2	13.27	61.22	4.66	1.39	7.43	1.06	100
	3.36	4.67	12.99	50.31	9.78	4.38	13.9	0.61	100
	0.88	8.54	14.73	64	0	0	6.66	4.81	99.62
	2.04	5.09	13.11	52.04	12.17	3.75	10.41	1.38	100
	2.33	0	12.38	75.11	0	0	5.31	4.88	100
334-336	1,68	5,36	16,05	60,09	3,01	0,84	9,4	3,56	100
	0	14.7	4.82	51.51	21.2	1.55	5.99	0	100
	2,18	7,26	13,28	50,76	11,33	1,46	10,57	0	96.84
	2.17	7.39	13.44	52.78	11.4	1.41	11.29	0.12	100
	1,13	4,15	14,52	59,94	8,11	1,42	7,62	3,11	100
	2.15	7.69	14.41	50.5	10.66	1.74	11.97	0.12	99.24
	2.09	7.69	13.9	51.93	11.69	1.62	10.92	0.07	100
	3.79	5.59	13.95	52.52	11.05	2.06	11.04	0	100
	3.29	4.03	14.17	55.9	8.79	2.08	11.15	0.59	100
	3.14	3.45	10.63	56.38	7.73	4.19	13.2	1.29	100
	1.98	0	11.01	70.38	4.47	3.46	6.08	2.62	100
	2.08	8.71	14.52	55.97	9.8	1.47	7.44	0	100
	0	5.33	12.29	49.24	14.07	1.93	17.14	0	100
	4.66	0	12.93	75.26	0.68	0	3.09	3.39	100
	1.38	0.61	12.8	70.49	5.01	2.72	5.21	1.78	100
338-340	4.51	0	12.54	71.45	1.28	0	3.65	3.33	96.76
	0	16,02	3,99	52,56	18,8	0,97	7,05	0	100
	3.67	5.09	16.18	50.52	10.28	2.78	10.84	0.63	99.99
	2,55	5,34	15,19	54,83	8,54	2,39	10,15	1	100
	0,68	13,18	3,9	50,12	19,62	2,31	8,55	0	98.37
	4.46	0	27.32	54.83	10.98	0	0.88	0.58	99.05
	4.37	2.14	14.64	56.3	4.54	2.49	7.79	4.66	97.42
	2.24	7.05	13.36	51.01	11.35	1.44	10.79	0.18	97.42
	2,98	5,21	12,54	50,17	9,63	4,44	14,35	0,68	100
	4.56	0	12.48	71.84	1.2	0.18	3.65	3.46	97.37
	2.48	6.49	13.28	53.46	10.47	1.63	12.07	0.12	100
	2.28	7.29	13.5	52.56	11.43	1.3	11.21	0.14	99.71
	3.22	2.67	20.59	52.89	11.47	1.47	7.49	0.2	100
355-357	2,01	7,88	13,8	53,26	11,8	1,09	10,15		100
	2.31	6.31	15.89	52.58	11.84	1.29	9.71	0.07	100
360-368	1.88	8.69	12.32	52.32	11.94	1.58	11.13	0.08	100
	0	0	0	0	0	0	0	0
370-372	6.28	0	18.88	66.9	1.02	0	0	6.27	100
	4.45	0	18.4	67.65	0.26	0	0	7.93	98.89
	0	0,77	16,92	79,1	0	3	2,09	1,12	100
376-378	0.98	10.22	15.64	45.88	8	0	19.31	0.18	100.71
	1.83	7.82	11.23	51.12	14.19	1.44	10.33	0	99.64
	2.65	7.99	13.2	55.17	13.86	0.65	5.18	0.1	100
	1,92	7,28	13,16	52,73	11,24	1,03	10,24	0	97,6
	1,96	7,32	13,14	53,13	11,34	1,05	10,35	0	98,3
